# Supplementary material
Source: PubMed Central journal article supplement (PMC4390631)
Supplement: JCM.02594-14_zjm999094060so1.pdf [file JCM.02594-14_zjm999094060so1.pdf]

## Supplementary data

**Table S1.** List of primers used in this study

| Gene              | Primer             | Sequence (5'–3')        | Product (bp) | Reference or source |
|-------------------|--------------------|-------------------------|--------------|---------------------|
| <i>qnrA</i>       | <i>qnrAF</i>       | AGAGGATTTCTCACGCCAGG    | 580          | 1                   |
|                   | <i>qnrAR</i>       | TGCCAGGCACAGATCTTGAC    |              |                     |
| <i>qnrB</i>       | <i>qnrBF</i>       | GGCATTGAAATTCGCCACTG    | 264          | 1                   |
|                   | <i>qnrBR</i>       | TTTGCTGCTCGCCAGTCGAA    |              |                     |
| <i>qnrS</i>       | <i>qnrSF</i>       | GCAAGTTCATTGAACAGGGT    | 428          | 1                   |
|                   | <i>qnrSR</i>       | TCTAAACCGTCGAGTTCGGCG   |              |                     |
| <i>qnrC</i>       | <i>qnrCF</i>       | GGGTTGTACATTTATTGAATCG  | 307          | 2                   |
|                   | <i>qnrCR</i>       | CACCTACCCATTTATTTTCA    |              |                     |
| <i>qnrD</i>       | <i>qnrDF</i>       | GGGTTGATTTAACTGATAC     | 311          | 3                   |
|                   | <i>qnrDR</i>       | TTCGCACTTTTCTAATATGAC   |              |                     |
| <i>aac(6')-Ib</i> | <i>aac(6')-IbF</i> | TTGCGATGCTCTATGAGTGGCTA | 482          | 4                   |
|                   | <i>aac(6')-IbR</i> | CTCGAATGCCTGGCGTGTTT    |              |                     |
| <i>qepA</i>       | <i>qepAF</i>       | GCAGGTCCAGCAGCGGGTAG    | 218          | 3                   |
|                   | <i>qepAR</i>       | CTTCCTGCCGAGTATCGTG     |              |                     |
| <i>oqxA</i>       | <i>oqxAF</i>       | CTCGGCGCGATGATGCT       | 392          | 5                   |
|                   | <i>oqxAR</i>       | CCACTCTTCACGGGAGACGA    |              |                     |
| <i>oqxB</i>       | <i>oqxBF</i>       | TTCTCCCCCGGCGGGAAGTAC   | 512          | 5                   |
|                   | <i>oqxBR</i>       | CTCGGCCATTTTGGCGCGTA    |              |                     |
| <i>gyrA</i>       | <i>gyrAF</i>       | GCGATGTCGGTCATTGTT      | 490          | This study          |
|                   | <i>gyrAR</i>       | ACTTCCGTCAGGTTGTGC      |              |                     |
| <i>gyrB</i>       | <i>gyrBF</i>       | TGAAATGACCCGCCGTAA      | 458          | This study          |
|                   | <i>gyrBR</i>       | GCTTGCCTTTCTTCACTTTGTA  |              |                     |
| <i>parC</i>       | <i>parCF</i>       | TGCGTTGCCGTTTATTGG      | 470          | This study          |
|                   | <i>parCR</i>       | GCAGGTTATGCGGTGGAAT     |              |                     |
| <i>parE</i>       | <i>parEF</i>       | AACTGCTGGCGGAGATGG      | 490          | This study          |

**Supplemental References**

1. **Cattoir V, Poirel L, Rotimi V, Soussy CJ, Nordmann P.** 2007. Multiplex PCR for detection of plasmid-mediated quinolone resistance qnr genes in ESBL-producing enterobacterial isolates. *J Antimicrob Chemother* **60**:394-397.
2. **Kim HB, Park CH, Kim CJ, Kim EC, Jacoby GA, Hooper DC.** 2009. Prevalence of plasmid-mediated quinolone resistance determinants over a 9-year period. *Antimicrob Agents Chemother* **53**:639-645.
3. **Zhao JY, Dang H.** 2012. Coastal seawater bacteria harbor a large reservoir of plasmid-mediated quinolone resistance determinants in Jiaozhou Bay, China. *Microb Ecol* **64**:187-199.
4. **Park CH, Robicsek A, Jacoby GA, Sahm D, Hooper DC.** 2006. Prevalence in the United States of *aac(6)-Ib-cr* encoding a ciprofloxacin-modifying enzyme. *Antimicrob Agents Chemother* **50**:3953-3955.
5. **Kim HB, Wang M, Park CH, Kim EC, Jacoby GA, Hooper DC.** 2009. *oqxAB* encoding a multidrug efflux pump in human clinical isolates of Enterobacteriaceae. *Antimicrob Agents Chemother* **53**:3582-3584.

**Table S2.** Plasmid-mediated PMQR and ESBL genes

| ALL E.coli (n=590)    |                                   | ESBL+PMQR (n=110) |                           | ESBL+PMQR Type                 |     |
|-----------------------|-----------------------------------|-------------------|---------------------------|--------------------------------|-----|
| ESBL                  | PMQR                              | ESBL              | PMQR                      | Type                           | No. |
| CTX-M-14 (163, 27.6%) | <i>aac(6')-Ib-cr</i> (116, 19.7%) | CTX-M-14 (60)     | <i>aac(6')-Ib-cr</i> (72) | CTX-M-14+ <i>aac(6')-Ib-cr</i> | 23  |
| CTX-M-55 (47, 8.0%)   | <i>qepA</i> (85, 14.4%)           | CTX-M-15 (20)     | <i>qepA</i> (29)          | CTX-M-15+ <i>aac(6')-Ib-cr</i> | 18  |
| CTX-M-15 (30, 5.1%)   | <i>oqxAB</i> (23, 3.8%)           | CTX-M-55 (12)     | <i>oqxAB</i> (12)         | CTX-M-14+ <i>qepA</i>          | 16  |
|                       | <i>qnrS</i> (13, 2.2%)            |                   | <i>qnrS</i> (9)           | CTX-M-55+ <i>aac(6')-Ib-cr</i> | 7   |
|                       | <i>qnrB</i> (9, 1.5%)             |                   | <i>qnrB</i> (8)           | CTX-M-15+ <i>qepA</i>          | 6   |
|                       |                                   |                   |                           | CTX-M-14+ <i>qnrB</i>          | 6   |
|                       |                                   |                   |                           | CTX-M-14+ <i>qnrS</i>          | 4   |
|                       |                                   |                   |                           | CTX-M-14+ <i>oqxAB</i>         | 4   |
